# Supplementary material for: Influence of late pruning practice on two red skin grapevine cultivars in a semi-desert climate
Source: Front Plant Sci. 2023 Feb 8;14:1114696. doi: 10.3389/fpls.2023.1114696 (PMC9945113; doi:10.3389/fpls.2023.1114696)
Supplement: Supplementary file 4 [file Table_1.xlsx]

## Sheet: ANOVA
	TableS1. Detected metabolites and their statistical significance in must samples. Statistical significance was calculated by Multi-factor Analysis of Variance. Asterisks indicate significant differences between treatments, cultivars, and years.
	MUST		Syrah + Malbec																					SYRAH													MALBEC
			treatment		cultivar		year		block		treat*cult		treat*year		cultivar*year		treat*cult*year		Tukey's test					treatment		year		block		treat*year		Tukey's test					treatment		year		block		treat*year		Tukey's test
			sign	p-value	sign	p-value	sign	p-value	sign	p-value	sign	p-value	sign	p-value	sign	p-value	sign	p-value	A (3 wab)	C (2wab)	B (1wab)	D (thin)	E (contr)	sign	p-value	sign	p-value	sign	p-value	sign	p-value	A (3 wab)	C (2wab)	B (1wab)	D (thin)	E (contr)	sign	p-value	sign	p-value	sign	p-value	sign	p-value	A (3 wab)	C (2wab)	B (1wab)	D (thin)	E (contr)
	Amino acid	Phenylalanine	*	0.0161	ns	0.6749	***	1.847e-14	ns	0.3626	ns	0.54	ns	0.336	ns	0.4708	ns	0.1419	b	b	ab	ab	a	ns	0.2443	***	8.909e-07	ns	0.8846	ns	0.2334						**	0.008381	***	4.026e-09	ns	0.126633	ns	0.229831	b	ab	ab	a	ab
		Tryptophan	**	0.00163	***	5.701e-07	***	2.2e-16	ns	0.106429	**	0.003242	**	0.005861	*	0.028026	**	0.002746	b	ab	ab	ab	a	***	0.0005156	***	2.328e-09	*	0.0240611	*	0.028655	b	a	a	a	a	ns	0.175705	***	1.546e-10	ns	0.829697	**	0.003039
	Anthocyanin	Delph-3-glu	***	2.254e-08	***	4.097e-16	**	0.0046529	ns	0.65173	***	0.0001274	ns	0.667655	ns	0.212523	ns	0.794541	a	ab	bc	bc	c	***	6.219e-06	*	0.01427	ns	0.80146	ns	0.78814	a	ab	bc	c	c	**	0.006099	ns	0.1761	ns	0.684185	ns	0.648656	a	b	ab	b	b
		Mal-3-glu	***	0.0003993	***	1.062e-10	***	1.029e-09	ns	0.91611	ns	0.11366	ns	0.559705	.	0.0991962	ns	0.635714	a	b	b	b	b	***	1.692e-05	***	2.24e-06	.	0.08366	ns	0.1974	a	ab	bc	bc	c	ns	0.1089	***	1.21e-05	ns	0.3741	ns	0.9052
		Pet-3-glu	***	7.026e-11	***	2.2e-16	***	8.469e-06	ns	0.73102	***	0.0001096	*	0.0147531	ns	0.876526	ns	0.619847	a	b	b	bc	c	***	2.884e-09	***	0.0006067	ns	0.630072	.	0.0809413	a	b	c	c	c	*	0.03243	**	0.00152	ns	0.4886	ns	0.44767	a	b	ab	ab	ab
		Cyan-3-glu	***	3.165e-05	***	2.2e-16	***	3.091e-07	ns	0.98152	.	0.07606	ns	0.85069	*	0.0179	ns	0.60366	a	ab	bc	bc	c	***	3.117e-06	**	0.00723	ns	0.33599	ns	0.75063	a	ab	c	bc	c	ns	0.1652	***	2.246e-05	ns	0.4863	ns	0.732
		Peo-3-glu	***	0.0005082	***	5.588e-15	***	2.382e-10	ns	0.353223	ns	0.338388	ns	0.556842	ns	0.441228	ns	0.788703	a	b	b	b	b	***	2.084e-05	***	5.259e-07	ns	0.33611	*	0.04103	a	ab	bc	bc	c	ns	0.19615	***	3.453e-06	.	0.08737	ns	0.83453
		Delph-3-acet	***	1.653e-13	***	2.2e-16	***	2.681e-07	ns	0.1869	***	6.434e-08	ns	0.519	ns	0.6102	ns	0.1057	a	bc	b	cd	d	***	1.629e-08	***	0.000776	ns	0.441872	ns	0.23842	a	ab	bc	cd	d	***	0.0001113	***	4.842e-05	ns	0.231367	ns	0.329049	a	c	ab	ab	ab
		Mal-3-acet	**	0.004438	***	2.2e-16	***	2.865e-09	ns	0.938799	ns	0.104336	ns	0.559048	ns	0.51994	ns	0.90937	a	ab	b	b	b	***	0.0002083	***	2.381e-06	ns	0.224255	ns	0.284026	a	a	b	b	b	.	0.07377	***	5.041e-05	ns	0.26402	ns	0.7102
		Pet-3-acet	***	3.524e-07	***	2.2e-16	***	0.0001609	ns	0.854943	*	0.0221088	.	0.0854622	ns	0.394434	ns	0.388679	a	bc	b	bc	c	***	1.288e-07	**	0.005684	ns	0.749565	ns	0.180159	a	ab	bc	cd	d	*	0.01427	**	0.007912	ns	0.988571	ns	0.218674	a	b	ab	b	b
		Cyan-3-acet	***	2.515e-08	***	2.2e-16	***	2.638e-07	ns	0.333321	**	0.004716	ns	0.606687	ns	0.135495	ns	0.288231	a	b	bc	c	c	***	2.324e-06	***	5.923e-05	ns	0.2586	ns	0.7798	a	ab	bc	c	c	*	0.033644	**	0.008816	ns	0.905517	ns	0.446087	a	b	b	b	b
		Peo-3-acet	***	0.0001663	***	2.2e-16	***	7.912e-09	ns	0.297043	*	0.0442387	ns	0.595109	ns	0.281948	ns	0.867267	a	ab	b	b	b	***	1.697e-05	***	4.601e-05	ns	0.305	ns	0.5603	a	ab	bc	c	bc	.	0.06341	***	1.659e-05	*	0.02261	ns	0.60357
		Delph-3-coum	***	1.248e-05	***	2.064e-14	**	0.009009	ns	0.701398	*	0.049529	ns	0.426494	ns	0.178225	ns	0.5096	a	abc	ab	bc	c	***	6.847e-07	***	8.996e-05	ns	0.76824	.	0.05396	a	a	ab	bc	c	*	0.01774	ns	0.465	ns	0.78214	ns	0.76277	a	ab	ab	b	ab
		Mal-3-coum	*	0.03149	***	3.544e-09	*	0.04156	ns	0.88833	ns	0.12089	ns	0.91314	ns	0.91314	ns	0.79559	a	ab	ab	ab	b	*	0.0322	.	0.05986	ns	0.71077	ns	0.98647	ab	a	ab	ab	b	ns	0.29628	.	0.05315	ns	0.5918	ns	0.81391
		Pet-3-coum	***	2.241e-05	***	8.708e-15	*	0.01077	ns	0.99765	*	0.01162	ns	0.49132	*	0.03367	ns	0.51963	a	ab	ab	b	b	***	1.822e-05	***	0.0003578	ns	0.905719	.	0.0659131	a	a	ab	bc	c	*	0.02537	ns	0.3965	ns	0.75293	ns	0.90234	a	b	ab	ab	ab
		Cyan-3-coum	***	0.00014	***	2.2e-16	**	0.001002	ns	0.535625	*	0.022864	ns	0.704306	ns	0.677439	ns	0.770412	a	ab	b	b	b	***	4.646e-05	*	0.01242	ns	0.53638	ns	0.19852	a	a	ab	b	b	*	0.02811	.	0.06425	ns	0.79227	ns	0.91629	a	b	ab	ab	ab
		Peo-3-coum	**	0.006964	***	2.2e-16	*	0.025038	ns	0.470402	ns	0.258058	ns	0.819581	ns	0.364939	ns	0.83608	a	ab	ab	b	b	**	0.002984	ns	0.201235	ns	0.70312	ns	0.489161	a	a	ab	b	b	.	0.07025	ns	0.18265	ns	0.81249	ns	0.93696
		Vitisin_A	.	0.08008																				***	4.426e-05	ns	0.7271	ns	0.5383	ns	0.1764	a	ab	bc	c	c	*	0.01298	ns	0.63402	ns	0.79644	ns	0.17879	a	b	ab	ab	a
	Flavanol	Proc-B1	.	0.065727	**	0.007877	***	2.474e-09	ns	0.879698	ns	0.180264	*	0.049166	ns	0.102178	*	0.012161						ns	0.63225	***	9.507e-06	ns	0.83721	*	0.02514						ns	0.11077	***	1.336e-05	ns	0.82264	.	0.09911
		Proc-rt1.84	**	0.008198	**	0.001564	***	6.325e-11	ns	0.602521	ns	0.455407	*	0.010283	**	0.003757	**	0.001271	a	ab	b	b	b	*	0.033317	***	7.79e-06	ns	0.963405	**	0.006546	a	ab	b	ab	ab	*	0.025252	***	6.354e-07	ns	0.530722	**	0.004884	a	ab	b	ab	b
		Proc-B2	ns	0.8122	***	2.2e-16	***	8.839e-11	ns	0.7062	ns	0.5117	ns	0.157	ns	0.3497	ns	0.6815						ns	0.7712	***	3.54e-07	ns	0.3176	ns	0.1652						ns	0.7133	***	2.06e-05	ns	0.657	ns	0.483
		Proc-rt2.6	***	0.0009355	***	2.724e-07	***	3.219e-07	ns	0.282136	*	0.0135905	*	0.045172	**	0.0075148	**	0.0013434	a	a	ab	ab	b	ns	0.302696	**	0.007481	ns	0.815103	ns	0.184142						**	0.005891	***	4.253e-05	ns	0.301087	**	0.007187	a	ab	ab	ab	b
		Catechin	**	0.0080518	ns	0.10818	***	7.181e-11	ns	0.648162	ns	0.103641	ns	0.192666	***	0.0003669	ns	0.424949	a	ab	ab	ab	b	ns	0.55982	***	6.392e-05	ns	0.2886	.	0.05196						**	0.006733	***	2.054e-07	ns	0.659133	ns	0.145734	a	ab	bc	abc	c
		Epicatechin	ns	0.19616	***	6.009e-13	***	2.919e-08	ns	0.28068	.	0.09953	ns	0.94616	ns	0.14228	ns	0.73214						ns	0.189999	**	0.003294	ns	0.119059	ns	0.767664						ns	0.326	***	8.568e-07	ns	0.8265	ns	0.9393
		Epigallocatechin	ns	0.128487	***	0.0001575	***	1.416e-06	ns	0.692792	ns	0.550506	ns	0.725704	ns	0.837629	**	0.0039375						ns	0.131496	**	0.001649	ns	0.689677	ns	0.127532						ns	0.349049	***	0.0001591	ns	0.235415	*	0.0251515
		Gallocatechin	***	4.868e-05	***	1.455e-11	**	0.001543	ns	0.725044	**	0.002453	ns	0.385779	**	0.007703	ns	0.593934	a	a	a	ab	b	***	7.639e-05	***	0.000368	ns	0.433543	ns	0.415619	a	ab	abc	bc	c	ns	0.7193	ns	0.663	ns	0.1462	ns	0.5716
	Flavanone	Narin-chalc-glu	ns	0.1019	***	2.2e-16	***	1.843e-06	ns	0.32104	ns	0.19564	ns	0.86715	.	0.05629	ns	0.79437						ns	0.61135	***	7.184e-06	.	0.08011	ns	0.93029						*	0.01506	*	0.01129	ns	0.73858	ns	0.45315	ab	b	b	ab	ab
	Flavanonol	Astilbin	ns	0.26606	***	2.2e-16	***	3.491e-08	.	0.08797	ns	0.11692	ns	0.78247	ns	0.86868	*	0.01786						.	0.07949	ns	0.22754	***	6.245e-05	ns	0.15185						ns	0.22818	***	5.433e-05	ns	0.83479	*	0.03704
	Flavonol	Quercetin	**	0.006402	.	0.099895	ns	0.202976	.	0.063514	.	0.067875	ns	0.781819	*	0.021572	ns	0.75577	a	ab	ab	ab	b	**	0.003736	*	0.017256	ns	0.246688	ns	0.838165	a	ab	ab	b	b	ns	0.4588	ns	0.4519	ns	0.1512	ns	0.7052
		Quer-3-glu	ns	0.86948	***	2.2e-16	***	1.701e-06	.	0.05246	ns	0.576	ns	0.36167	ns	0.40835	ns	0.28324						.	0.081775	***	4.632e-09	**	0.004662	.	0.097718						ns	0.95059	*	0.02325	ns	0.38115	ns	0.41144
		Quer-3-glr	ns	0.33191	.	0.074613	*	0.049045	ns	0.154257	ns	0.173278	ns	0.240317	**	0.003046	ns	0.830011						ns	0.65911	***	1.712e-05	ns	0.77575	*	0.03312						ns	0.1982	ns	0.7583	ns	0.1288	ns	0.9144
		Rutin	ns	0.3679	***	2.408e-11	ns	0.2283	ns	0.6711	ns	0.2911	ns	0.6787	ns	0.7482	ns	0.3471						ns	0.2622	ns	0.4922	ns	0.6109	ns	0.3361						ns	0.4249	ns	0.3513	ns	0.3454	ns	0.5274
		Myricetin	**	0.004325	***	2.2e-16	***	3.997e-10	ns	0.123561	.	0.06164	ns	0.770751	**	0.009653	ns	0.826412	a	ab	ab	ab	b	***	0.0001954	***	0.0003622	ns	0.776949	ns	0.584456	a	ab	abc	bc	c	ns	0.6235	***	3.408e-07	*	0.033	ns	0.9007
		Myr-3-glu	**	0.0056217	***	2.2e-16	***	8.039e-07	ns	0.161215	**	0.0077427	***	0.0002939	ns	0.200301	*	0.0217005	b	b	ab	a	ab	***	5.186e-05	***	5.141e-07	*	0.04179	*	0.03771	c	bc	bc	a	ab	ns	0.671566	*	0.01906	ns	0.737516	**	0.002428
		Myr-3-glr																						ns	na	ns	na	ns	na	ns	na						ns	na	ns	na	ns	na	ns	na
		Kaem-3-glu	***	0.000584	***	2.2e-16	**	0.002232	ns	0.122616	ns	0.270715	ns	0.22272	***	7.982e-05	ns	0.559067	c	bc	bc	ab	a	***	7.749e-05	***	1.913e-07	.	0.06566	ns	0.26845	b	b	b	a	a	ns	0.1188	ns	0.5414	ns	0.5445	ns	0.4317
		Kaemp-3-glr	ns	0.3331	ns	0.6011	***	2.2e-16	ns	0.6223	ns	0.489	ns	0.2252	***	9.065e-14	ns	0.8783						*	0.02753	***	2e-16	*	0.03536	ns	0.18796	b	a	ab	a	ab	ns	0.96631	***	1.297e-08	*	0.01174	ns	0.45252
	Hydroxycinnamic acid	p-coumarate	ns	0.1784	***	2e-16	ns	0.74216	ns	0.12264	ns	0.90835	ns	0.2807	*	0.04538	*	0.03206						ns	0.437	ns	0.194	ns	0.2302	ns	0.19						.	0.06036	ns	0.1413	ns	0.27495	*	0.02064
		Coutarate	*	0.03712	***	2.2e-16	***	2.527e-16	ns	0.39266	ns	0.67253	ns	0.32821	.	0.05277	*	0.02116	a	a	b	ab	ab	ns	0.2096	***	9.551e-09	ns	0.2843	ns	0.1341						*	0.01332	***	3.394e-09	ns	0.91268	*	0.04808	a	ab	ab	ab	b
		Coumarate-hex	*	0.01452	*	0.04757	***	2e-16	*	0.01678	ns	0.29117	ns	0.92473	*	0.02116	.	0.05036	b	ab	ab	a	ab	ns	0.235	***	2.129e-07	ns	0.117	ns	0.1797						*	0.01766	***	3.823e-11	ns	0.13634	ns	0.47718	b	ab	ab	a	ab
		Hydro-benz-hex	.	0.08102	**	0.00195	***	3.857e-11	ns	0.67586	ns	0.74555	ns	0.30139	.	0.0559	ns	0.29085						.	0.06389	***	2.112e-05	ns	0.99197	ns	0.23441						ns	0.3024	***	1.318e-06	ns	0.997	ns	0.4915
		Ferulate	**	0.00149	**	0.008841	*	0.043966	*	0.045055	**	0.004206	ns	0.616634	.	0.083507	***	0.000614	b	a	ab	ab	ab	ns	0.480292	**	0.004759	*	0.034915	*	0.014776						**	0.001216	ns	0.512894	ns	0.704863	.	0.065664	b	a	b	ab	b
		Caffeic acid																						ns	na	ns	na	ns	na	ns	na						ns	na	ns	na	ns	na	ns	na
		Caff-tart	*	0.0336546	***	5.757e-14	***	4.201e-16	ns	0.866739	ns	0.945701	ns	0.548184	ns	0.589669	***	0.0004197						ns	0.21381	***	3.689e-08	ns	0.24751	*	0.01904						**	0.008599	***	9.091e-10	ns	0.752284	*	0.013562	a	a	ab	ab	b
	Stilbene	trans-Piceid	***	0.0004371	***	8.826e-14	***	2.2e-16	ns	0.741939	**	0.0084723	ns	0.581404	.	0.0824818	**	0.004827	a	ab	b	b	b	**	0.005001	***	2.252e-10	ns	0.570198	ns	0.177864	a	ab	ab	b	b	*	0.03326	***	4.336e-09	ns	0.87974	*	0.018	a	ab	b	ab	ab
		cis-Piceid	***	1.027e-07	***	3.057e-09	***	1.092e-14	ns	0.293359	**	0.002041	***	1.352e-08	ns	0.639052	ns	0.775222	a	c	bc	bc	b	***	1.075e-06	***	1.49e-09	ns	0.353821	***	0.0001257	a	b	bc	c	bc	***	1.014e-06	***	2.445e-06	ns	0.727727	***	0.0003996	ab	b	bc	a	a
		trans-Resv	***	1.492e-08	***	8.654e-07	**	0.001241	ns	0.899565	***	3.842e-07	*	0.011047	ns	0.311411	*	0.025039	a	b	b	b	b	***	1.142e-05	*	0.011	ns	0.2365	.	0.062	a	b	b	b	b	**	0.004149	***	7.435e-05	ns	0.762433	ns	0.394999	ab	b	ab	a	a
		cis-Resv	***	3.013e-08	***	1.031e-07	ns	0.1166	ns	0.8126	***	3.595e-06	ns	0.9908	ns	0.148	ns	0.7311	a	b	b	b	b	***	6.632e-07	.	0.05807	ns	0.1835	ns	0.85517	a	b	b	b	b	**	0.007273	***	1.238e-06	ns	0.338804	**	0.004006	ab	b	b	ab	a
		delta-Viniferin	***	0.0008114	ns	0.961145	*	0.0177436	ns	0.352288	ns	0.909538	ns	0.752115	ns	0.51509	ns	0.724209	a	a	ab	b	b	***	4.193e-06	*	0.045716	**	0.006491	ns	0.778424	a	ab	bc	c	c	ns	0.10958	.	0.09278	ns	0.72516	ns	0.71775
	Organic acid	Benzoic acid	**	0.00389	ns	0.22107	***	1.557e-12	ns	0.76671	ns	0.85002	*	0.0284	ns	0.78006	*	0.03078	b	b	ab	ab	a	**	0.007256	***	4.613e-08	ns	0.791053	**	0.007492	b	b	ab	ab	a	.	0.09312	***	5.908e-06	ns	0.81546	ns	0.19543
		Tartarate	***	8.874e-06	***	2.682e-10	***	2.2e-16	ns	0.365684	.	0.066186	ns	0.697483	**	0.006702	ns	0.359297	c	bc	b	a	bc	***	0.0009586	***	9.594e-14	ns	0.18976	ns	0.786082	c	bc	ab	a	ab	**	0.002394	***	2.2e-16	ns	0.564607	ns	0.352145	b	b	ab	a	b
		Citrate	ns	0.36373	.	0.05012	***	2e-16	ns	0.96457	ns	0.32152	ns	0.76118	ns	0.79526	.	0.07333						ns	0.4734	***	5.269e-09	ns	0.6222	ns	0.3141						ns	0.28	***	7.934e-10	ns	0.5621	ns	0.2362
